# Supplementary material
Source: PubMed Central journal article supplement (PMC7387101)
Supplement: NIHMS1043676-supplement-1.pdf [file NIHMS1043676-supplement-1.pdf]

### 3.8 Supplementary material

**Table 1** Primer sequence used in qPCR

| <b>Gene</b>                                                                   | <b>Forward Primer 5' – 3'</b> | <b>Reverse Primer 5' – 3'</b> |
|-------------------------------------------------------------------------------|-------------------------------|-------------------------------|
| <i>Ccl2</i> – Chemokine (C-C motif) ligand 2                                  | ACACTGGTTCCTGACTCCTCT         | ACCTGAGGACTGATGGTGGT          |
| <i>Cd14</i> – Cluster of differentiation 14 antigen                           | CTCTGTCCTTAAAGCGGCTTA<br>C    | GTTGCGGAGGTTCAAGATGTT         |
| <i>Drd1</i> – Dopamine receptor D1 transcript variant 1                       | GTTGAGTCCAGGGGTTTTGG<br>G     | ACTTTTCGGGGATGCTGCC           |
| <i>Drd2</i> – Dopamine receptor D2                                            | GTGAACAGGCGGAGAATGGA          | TGGGAGGGATGGGGCTATAC          |
| <i>Gapdh</i> – Glyceraldehyde -3-phosphate dehydrogenase transcript variant 1 | AGGTCGGTGTGAACGGATTT<br>G     | TGTAGACCATGTAGTTGAGGTC<br>A   |
| <i>Ghrl</i> – Grehlin transcript variant 1                                    | ATCGTCCTCACCACCAAGAC          | CTTGGATTCTTTCTCTGGGCTT        |
| <i>Hmgb1</i> – High mobility group box 1, transcript variant 1                | CCATTGGTGATGTTGCAAAG          | CTTTTTCGCTGCATCAGGTT          |
| <i>Ifnb</i> – Interferon beta 1, fibroblast                                   | TGGGAGATGTCCTCAACTGC          | CCAGGCGTAGCTGTTGTACT          |
| <i>Lepr</i> – Leptin receptor transcript variant 3                            | TCCAAAAGAGAACGGACACT<br>C T   | TGTATGGACTGTTGGGAAGTTG        |
| <i>Il1b</i> – Interleukin 1 beta                                              | TGCCACCTTTTGACAGTGATG         | TGATGTGCTGCTGCGAGATT          |
| <i>Il10</i> – Interleukin 10                                                  | GCTCTTACTGACTGGCATGA<br>G     | CGCAGCTCTAGGAGCATGTG          |
| <i>Md2</i> – Lymphocyte antigen 96 transcript variant 1, 2                    | CGCTGCTTTCTCCCATATTGA         | CCTCAGTCTTATGCAGGGTTCA        |

| <b>Gene</b>                                                                     | <b>Forward Primer 5' – 3'</b> | <b>Reverse Primer 5' – 3'</b> |
|---------------------------------------------------------------------------------|-------------------------------|-------------------------------|
| <i>Myd88</i> –<br>Myeloid<br>differentiation<br>primary<br>response gene<br>88  | TCATGTTCTCCATACCCTTGG<br>T    | AAACTGCGAGTGGGGTCA            |
| <i>Oprm1</i> –<br>Opioid receptor,<br>mu 1, transcript<br>variant 1C, 1M,<br>1U | TCCGACTCATGTTGAAAAACC<br>C    | CCTTCCCCGGATTCCTGTCT          |
| <i>Rxfp1</i> –<br>Relaxin/insulin-<br>like family<br>peptide receptor<br>1      | CGAGCTGTCCCATCAGTTTCT         | AGACGCTCACGGAGTGAATC          |
| <i>Tlr4</i> –<br>Toll-like<br>receptor 4                                        | GCCTTTCAGGGAATTAAGCT<br>CC    | GATCAACCGATGGACGTGTAAA        |
| <i>Trif</i> –<br>Toll-like<br>receptor<br>adaptor<br>molecule 1                 | AACCTCCACATCCCCTGTTTT         | GCCCTGGCATGGATAACCA           |
| <i>Th</i> –Tyrosine<br>Hydroxylase                                              | CCTTCCGTGTGTTTCAGTGC          | TCAGCCAACATGGGTACGTG          |

### 3.8.1 Statistics for in-text figures

**Figure 2 Circadian timing affects the intake and preference of alcohol (a - b), saccharin (c - d) but not quinine (e - f) and the conditioned preference towards alcohol (g – h). All data analysed using a two-way ANOVA with Tukey post hoc.**

#### (a) *Alcohol intake*

Effect of concentration,  $F_{(8, 72)} = 68.34, p < 0.0001$

Effect of light-cycle,  $F_{(1, 9)} = 5.21, p = 0.048$

Interaction: concentration x light-cycle,  $F_{(8, 72)} = 2.02, p = 0.056$

#### (b) *Alcohol preference*

Effect of concentration,  $F_{(8, 72)} = 2.2, p = 0.037$

Effect of light-cycle,  $F_{(1, 9)} = 9.16, p = 0.014$

Interaction: concentration x light-cycle,  $F_{(8, 72)} = 0.30, p = 0.96$

#### (c) *Saccharin intake*

Effect of concentration,  $F_{(4, 36)} = 18.94, p < 0.0001$

Effect of light-cycle,  $F_{(1, 9)} = 15.53, p = 0.0034$

Interaction: concentration x light-cycle,  $F_{(4, 36)} = 2.98, p = 0.0318$

#### (d) *Saccharin preference*

Effect of concentration,  $F_{(4, 36)} = 1.74, p = 0.16$

Effect of light-cycle,  $F_{(1, 9)} = 8.32, p = 0.015$

Interaction: concentration x light-cycle,  $F_{(4, 36)} = 0.40, p = 0.81$

(e) *Quinine intake*

Effect of concentration,  $F_{(4, 36)} = 180.4$ ,  $p < 0.0001$

Effect of light-cycle,  $F_{(1, 9)} = 12.09$ ,  $p = 0.0052$

Interaction: concentration x light-cycle,  $F_{(4, 36)} = 6.14$ ,  $p = 0.0005$

(f) *Quinine preference*

Effect of concentration,  $F_{(4, 36)} = 2.94$ ,  $p = 0.031$

Effect of light-cycle,  $F_{(1, 9)} = 20.31$ ,  $p = 0.0009$

Interaction: concentration x light-cycle,  $F_{(4, 36)} = 0.35$ ,  $p = 0.84$

**Figure 5 Circadian timing affects the expression of genes relating to reward (a), thirst and hunger (b) and the TLR4 pathway (c – d).** All data analysed using a two-way ANOVA with Tukey post hoc.

(c) *Nucleus accumbens*

Effect of light cycle, *Cd14*,  $t = 0.67$   $df = 4$ ,  $p = 0.54$

Effect of light cycle, *Md2*,  $t = 0.22$   $df = 4$ ,  $p = 0.84$

Effect of light cycle, *Myd88*,  $t = 1.37$   $df = 4$ ,  $p = 0.24$

Effect of light cycle, *Trif*,  $t = 1.62$   $df = 4$ ,  $p = 0.18$

Effect of light cycle, *Il1b*,  $t = 0.12$   $df = 4$ ,  $p = 0.90$

Effect of light cycle, *Il10*,  $t = 0.89$   $df = 4$ ,  $p = 0.42$

Effect of light cycle, *Hmgb1*,  $t = 0.033$   $df = 4$ ,  $p = 0.98$

(d) *Hypothalamus*

Effect of light cycle, *Cd14*,  $t = 1.31$   $df = 4$ ,  $p = 0.26$

Effect of light cycle, *Myd88*,  $t = 0.52$   $df = 4$ ,  $p = 0.63$

Effect of light cycle, *Ccl2*,  $t = 1.16$   $df = 4$ ,  $p = 0.33$

Effect of light cycle, *Il10*,  $t = 1.78$   $df = 4$ ,  $p = 0.68$

Effect of light cycle, *Hmgb1*,  $t = 1.6$   $df = 4$ ,  $p = 0.24$

**Figure 6 Circadian timing influences the efficacy of (+)-Naltrexone on decreasing the intake and preference for alcohol (a – b) and saccharin (c – d) but not quinine (e – f). All data analysed using a two-way ANOVA with Tukey post hoc.**

*(a) Alcohol intake*

Effect of dose of (+)-Naltrexone,  $F_{(6, 48)} = 15.72$ ,  $p < 0.0001$

Effect of light-cycle,  $F_{(1, 8)} = 15.12$ ,  $p = 0.0046$

Interaction: dose of (+)-Naltrexone x light-cycle,  $F_{(6, 48)} = 4.99$ ,  $p = 0.0005$

*(b) Alcohol preference*

Effect of concentration,  $F_{(6, 48)} = 7.57$ ,  $p < 0.0001$

Effect of light-cycle,  $F_{(1, 8)} = 40.85$ ,  $p = 0.0002$

Interaction: dose of (+)-Naltrexone x light-cycle,  $F_{(6, 48)} = 0.64$ ,  $p = 0.70$

*(c) Saccharin intake*

Effect of dose of (+)-Naltrexone,  $F_{(6, 48)} = 2.56$ ,  $p = 0.076$

Effect of light-cycle,  $F_{(1, 8)} = 64.85$ ,  $p < 0.0001$

Interaction: dose of (+)-Naltrexone x light-cycle,  $F_{(6, 48)} = 0.86$ ,  $p = 0.53$

*(d) Saccharin preference*

Effect of dose of (+)-Naltrexone,  $F_{(6, 48)} = 3.82$ ,  $p = 0.0034$

Effect of light-cycle,  $F_{(1, 8)} = 39.16$ ,  $p = 0.0002$

Interaction: dose of (+)-Naltrexone x light-cycle,  $F_{(6, 48)} = 2.68$ ,  $p = 0.024$

(e) *Quinine intake*

Effect of dose of (+)-Naltrexone,  $F_{(6, 48)} = 3.05, p = 0.013$

Effect of light-cycle,  $F_{(1, 8)} = 11.09, p = 0.010$

Interaction: dose of (+)-Naltrexone x light-cycle,  $F_{(6, 48)} = 1.67, p = 0.15$

(f) *Quinine preference*

Effect of dose of (+)-Naltrexone,  $F_{(6, 48)} = 0.79, p = 0.58$

Effect of light-cycle,  $F_{(1, 8)} = 1.08, p = 0.33$

Interaction: dose of (+)-Naltrexone x light-cycle,  $F_{(6, 48)} = 1.29, p = 0.28$

**Figure 7 Circadian timing influences the efficacy of (+)-Naltrexone (60 mg/kg) on decreasing and the intake and preference for alcohol (a – b) and saccharin (c – d) but not quinine (e – f) and the conditioned preference for alcohol (g – h). All data analysed using a three-way ANOVA with Tukey post hoc.**

(a) *Alcohol intake*

Effect of concentration,  $F_{(7, 320)} = 61.53, p < 0.0001$

Effect of light-cycle,  $F_{(1, 320)} = 4.12, p = 0.043$

Effect of pretreatment,  $F_{(1, 320)} = 4.95, p = 0.026$

Interaction: concentration x light-cycle,  $F_{(7, 320)} = 3.05, p = 0.0040$

Interaction: concentration x pretreatment,  $F_{(7, 320)} = 0.60, p = 0.76$

Interaction: light-cycle x pretreatment,  $F_{(1, 320)} = 2.33, p = 0.13$

Interaction: concentration x light-cycle x pretreatment,  $F_{(7, 320)} = 2.82, p = 0.0073$

(b) *Alcohol preference*

Effect of concentration,  $F_{(7, 320)} = 3.72, p = 0.0007$

Effect of light-cycle,  $F_{(1, 320)} = 311.2, p < 0.0001$

Effect of pretreatment,  $F_{(1, 320)} = 25.68, p < 0.0001$

Interaction: concentration x light-cycle,  $F_{(7, 320)} = 2.52, p = 0.016$

Interaction: concentration x pretreatment,  $F_{(7, 320)} = 2.31, p = 0.026$

Interaction: light-cycle x pretreatment,  $F_{(1, 320)} = 11.17, p = 0.0009$

Interaction: concentration x light-cycle x pretreatment,  $F_{(7, 320)} = 0.79, p = 0.60$

(c) *Saccharin intake*

Effect of concentration,  $F_{(4, 220)} = 97.07, p < 0.0001$

Effect of light-cycle,  $F_{(1, 220)} = 75.11, p < 0.0001$

Effect of pretreatment,  $F_{(1, 220)} = 8.95, p = 0.0031$

Interaction: concentration x light-cycle,  $F_{(4, 220)} = 12.39, p < 0.0001$

Interaction: concentration x pretreatment,  $F_{(4, 220)} = 1.43, p = 0.23$

Interaction: light-cycle x pretreatment,  $F_{(1, 220)} = 9.11, p = 0.0028$

Interaction: concentration x light-cycle x pretreatment,  $F_{(4, 220)} = 1.83, p = 0.13$

(d) *Saccharin preference*

Effect of concentration,  $F_{(4, 220)} = 0.85, p = 0.49$

Effect of light-cycle,  $F_{(1, 220)} = 31.38, p < 0.0001$

Effect of pretreatment,  $F_{(1, 220)} = 0.25, p = 0.62$

Interaction: concentration x light-cycle,  $F_{(4, 220)} = 0.68, p = 0.61$

Interaction: concentration x pretreatment,  $F_{(4, 220)} = 0.24, p = 0.92$

Interaction: light-cycle x pretreatment,  $F_{(1, 220)} = 1.37, p = 0.24$

Interaction: concentration x light-cycle x pretreatment,  $F_{(4, 220)} = 0.27, p = 0.89$

(e) *Quinine intake*

Effect of concentration,  $F_{(4, 220)} = 45.38, p < 0.0001$

Effect of light-cycle,  $F_{(1, 220)} = 0.016, p = 0.90$

Effect of pretreatment,  $F_{(1, 220)} = 4.32, p = 0.039$

Interaction: concentration x light-cycle,  $F_{(4, 220)} = 0.38, p = 0.83$

Interaction: concentration x pretreatment,  $F_{(4, 220)} = 4.27, p = 0.0024$

Interaction: light-cycle x pretreatment,  $F_{(1, 220)} = 0.018, p = 0.89$

Interaction: concentration x light-cycle x pretreatment,  $F_{(4, 220)} = 0.062, p = 0.99$

*(f) Quinine preference*

Effect of concentration,  $F_{(4, 220)} = 4.39, p = 0.0020$

Effect of light-cycle,  $F_{(1, 220)} = 0.0058, p = 0.94$

Effect of pretreatment,  $F_{(1, 220)} = 2.02, p = 0.16$

Interaction: concentration x light-cycle,  $F_{(4, 220)} = 2.49, p = 0.0443$

Interaction: concentration x pretreatment,  $F_{(4, 220)} = 0.89, p = 0.47$

Interaction: light-cycle x pretreatment,  $F_{(1, 220)} = 14, p = 0.0002$

Interaction: concentration x light-cycle x pretreatment,  $F_{(4, 220)} = 0.51, p = 0.73$

**Figure 8 Circadian timing influences efficacy of (+)-Naltrexone on relative change in conditioned chamber time.** All data analysed using a two-way ANOVA with Tukey post hoc.

*Relative conditioned place preference*

Effect of pretreatment,  $F_{(1, 7)} = 20.52, p = 0.0027$

Effect of light-cycle,  $F_{(1, 7)} = 0.0011, p = 0.92$

Interaction: pretreatment x light-cycle,  $F_{(1, 7)} = 1.62, p = 0.24$



### 3.8.2 Supplementary figures

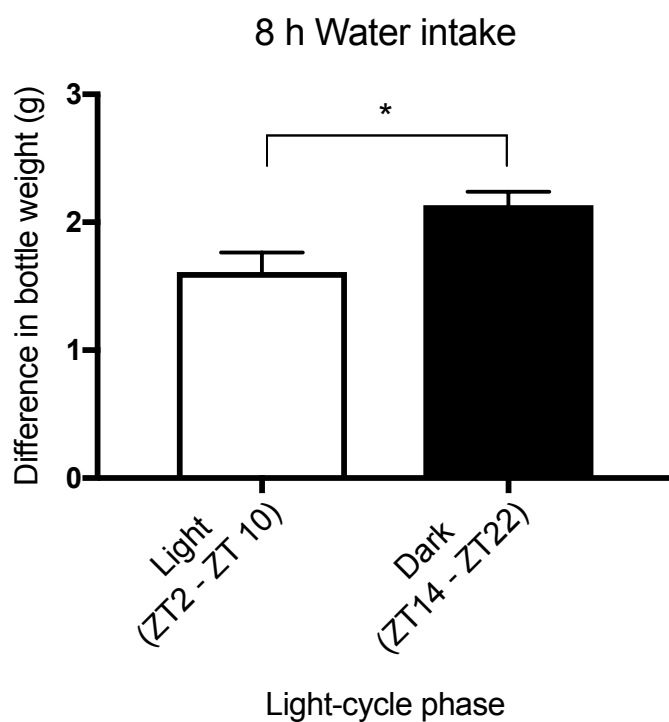

**Figure s1 Circadian timing affects the intake of water.** Mice in the dark cycle consumed significantly more water compared to mice in the light cycle. All data was analysed using a paired two-tail t-test. Summary values represented mean $\pm$ SEM; n=49, \* $p < 0.05$ .

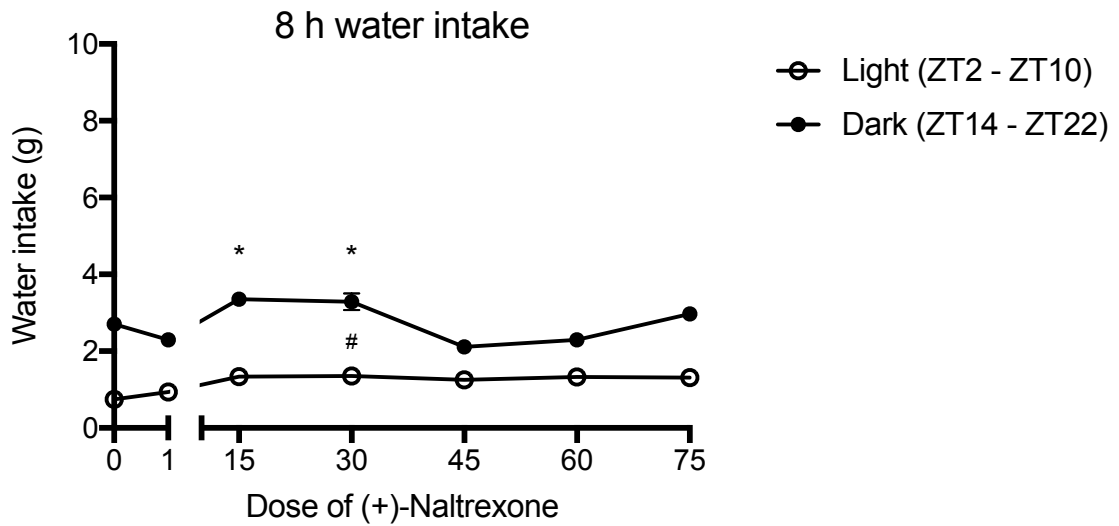

**Figure s2 Circadian timing and the dose of (+)-Naltrexone significantly modify water intake.** Mice receiving (+)-Naltrexone in the dark cycle consumed significantly more water compared to mice in the light cycle. All data was analysed using a two-way ANOVA with Tukey post hoc. Summary values represented as mean $\pm$ SEM; n=9, \* $p$  < 0.05 compared to saline (dark); #  $p$  < 0.05 compared to saline (light).

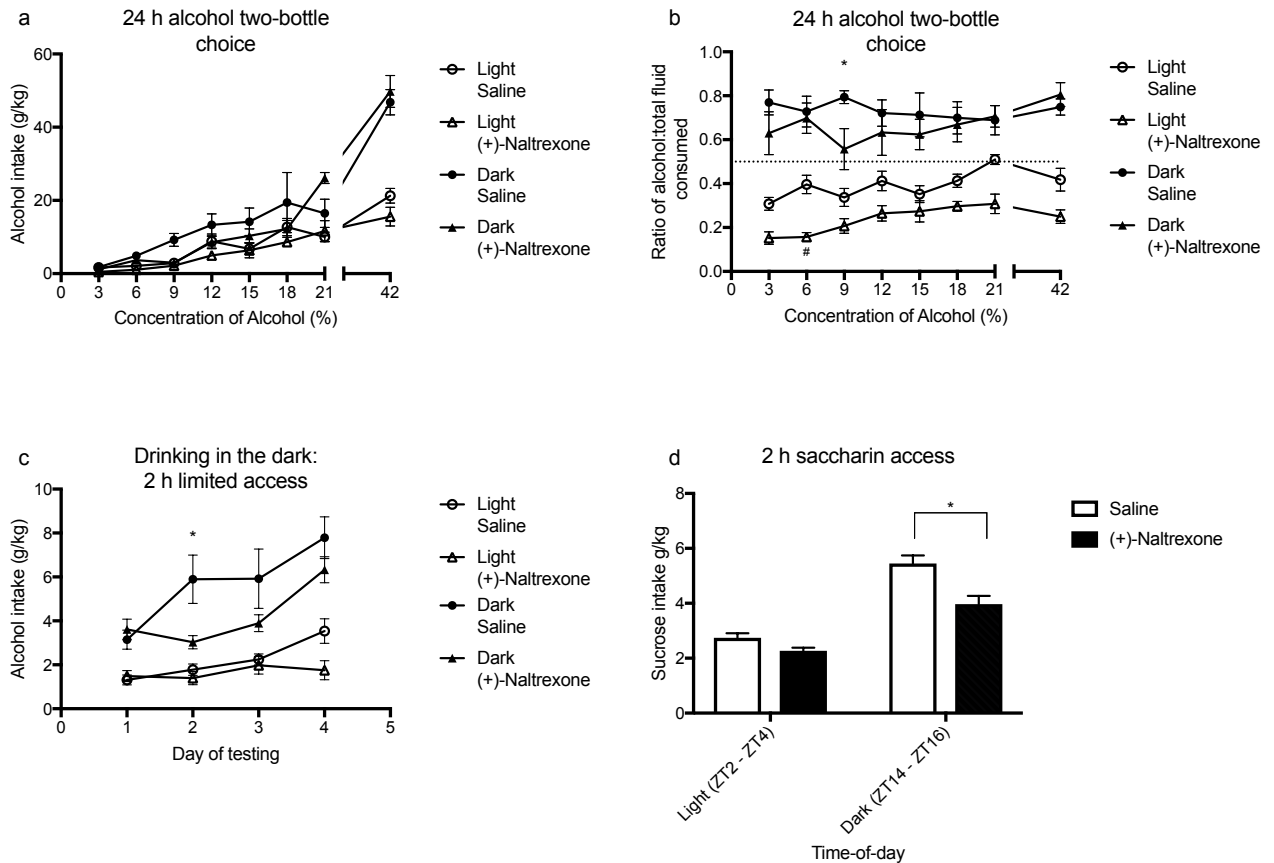

**Figure s3** The efficacy of (+)-Naltrexone (60 mg/kg) on decreasing 24 h intake and preference (a –b) of alcohol (20%), 2-4 h intake of alcohol (c) and saccharin (15mM) (d) is greatest during the dark cycle. All data was analysed using a three-way ANOVA with Tukey HSD post hoc (a – c) and a two-way ANOVA with Tukey post hoc (d). There was a significant effect of pretreatment for the intake and preference of alcohol during the 24 h two-bottle choice tests. Similarly, the drinking in the dark and 2 h saccharin access tests exhibited a significant effect of pretreatment. Post hoc analysis determined (+)-Naltrexone significantly attenuated intake compared to saline during the dark but not light cycle in both paradigms. Summary values represented as mean±SEM; n=11–12,  $p < 0.05$  compared to saline (dark); #  $p < 0.05$  compared to saline (light).

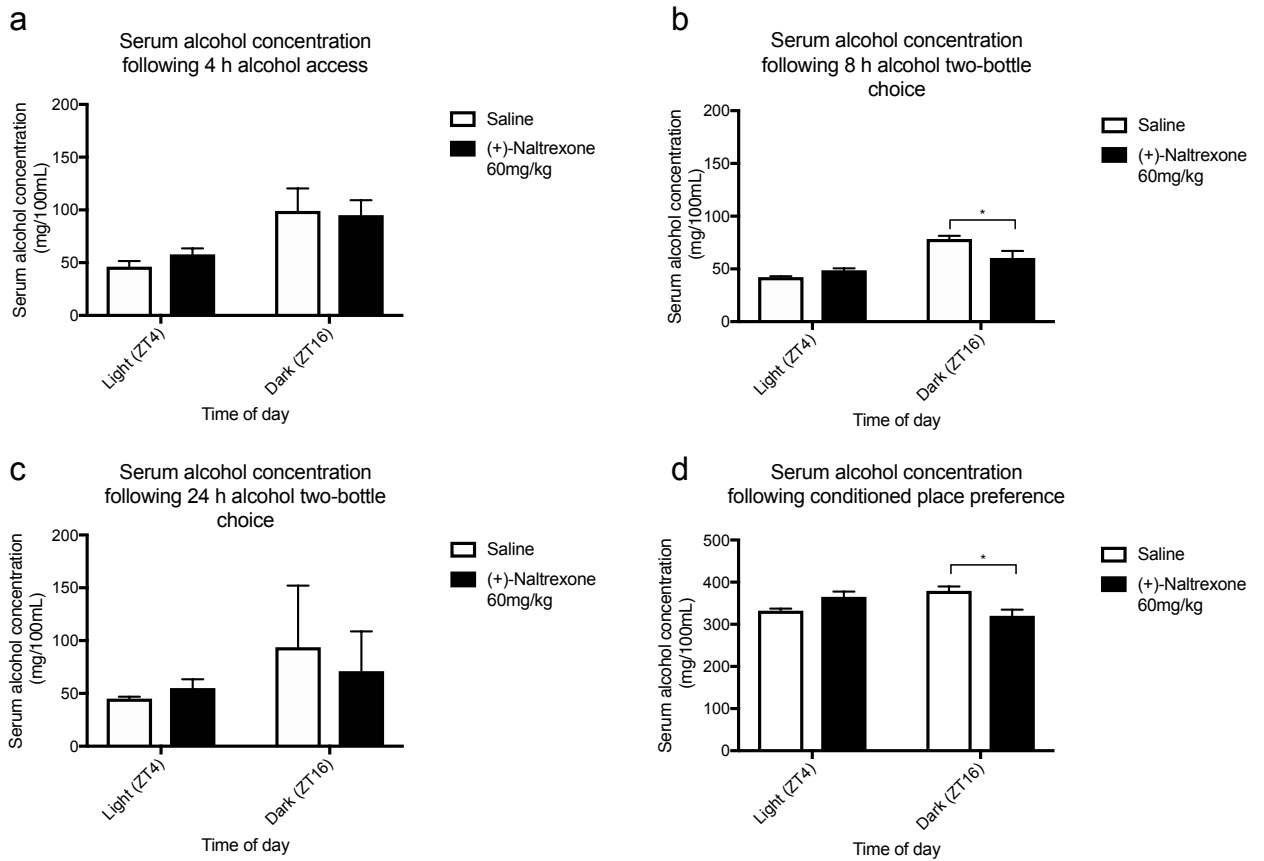

**Figure s4 Serum alcohol concentration from saline and (+)-Naltrexone-treated mice (60 mg/kg) following 2 h (a), 8 h (b) and 24 h (c) alcohol drinking tests and conditioned place preference (d). All data was analysed using a two-way ANOVA with Tukey post hoc (a – d). Summary values represented as mean±SEM; n=6.**

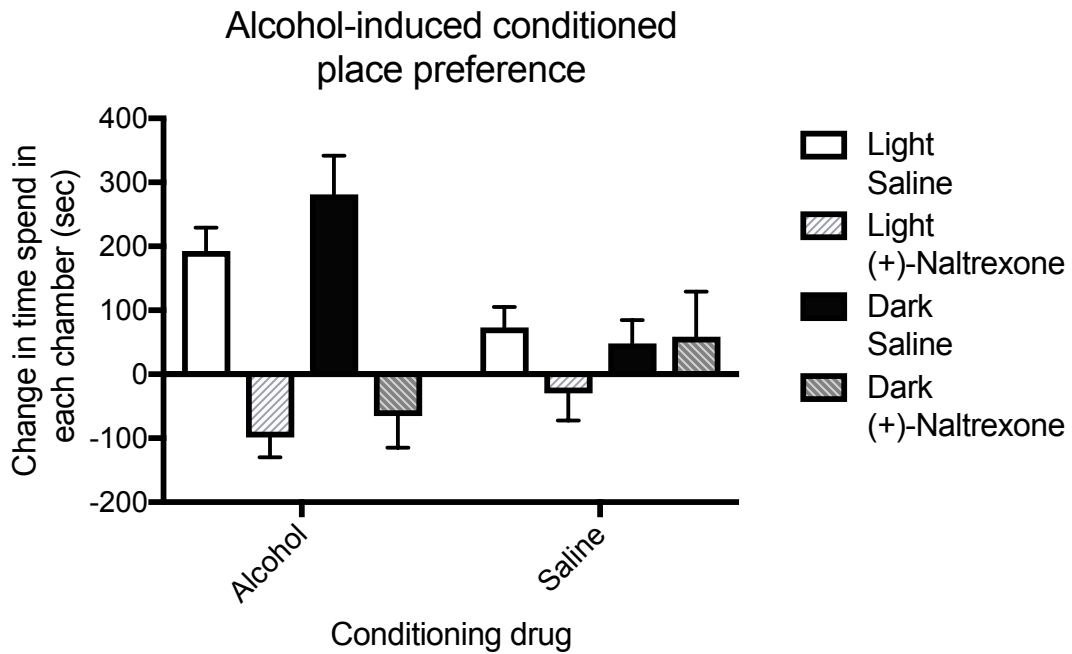

**Figure s5. Circadian timing influences efficacy of (+)-Naltrexone (60 mg/kg) on change in conditioned chamber time.** All data was analysed using a three-way ANOVA with Tukey post hoc (a – d). Summary values represented as mean $\pm$ SEM; n=8, \* $p < 0.05$ .

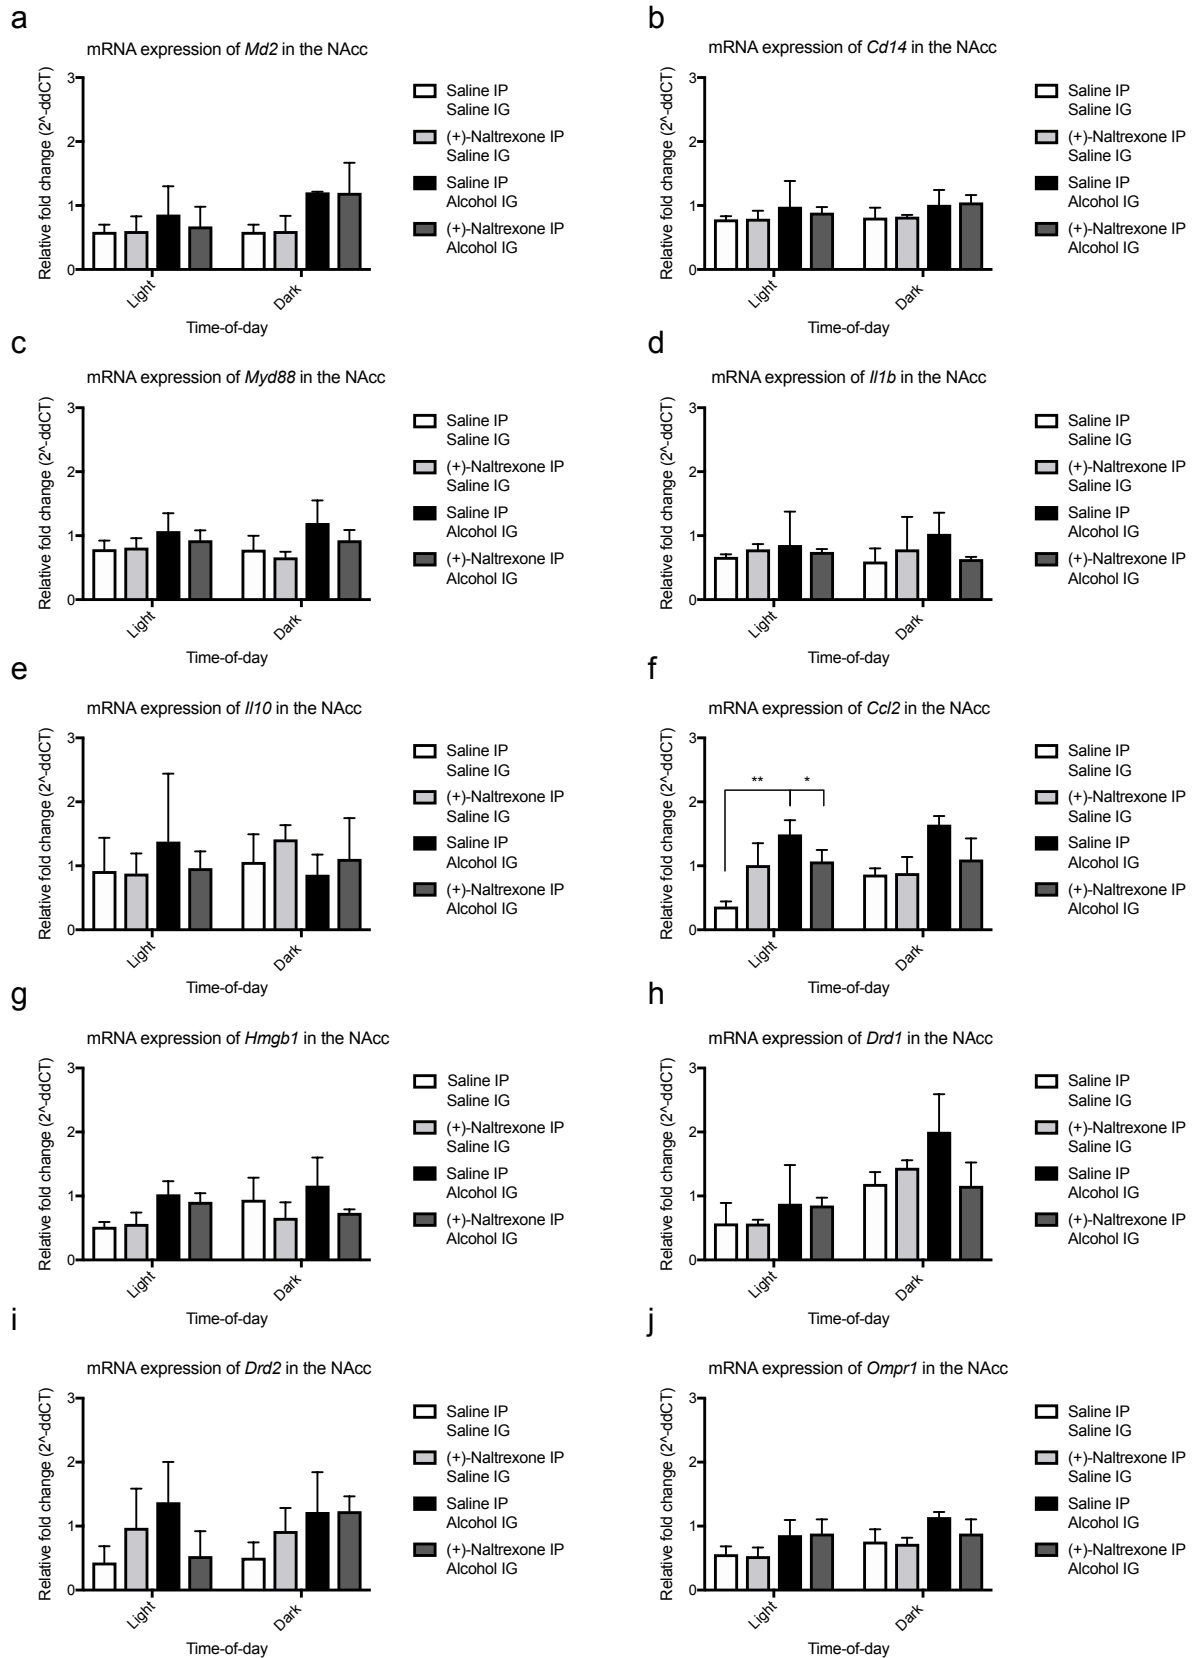

**Figure s6** Effect of alcohol, saline (I.G), (+)-Naltrexone (60 mg/kg) on the expression of TLR4 and reward-related genes in the Nucleus Accumbens. All data was analysed using a two-way ANOVA with Bonferonni post hoc. Summary values represented as mean $\pm$ SEM; n=3, \* $p < 0.05$ ; \*\* $p < 0.01$ .

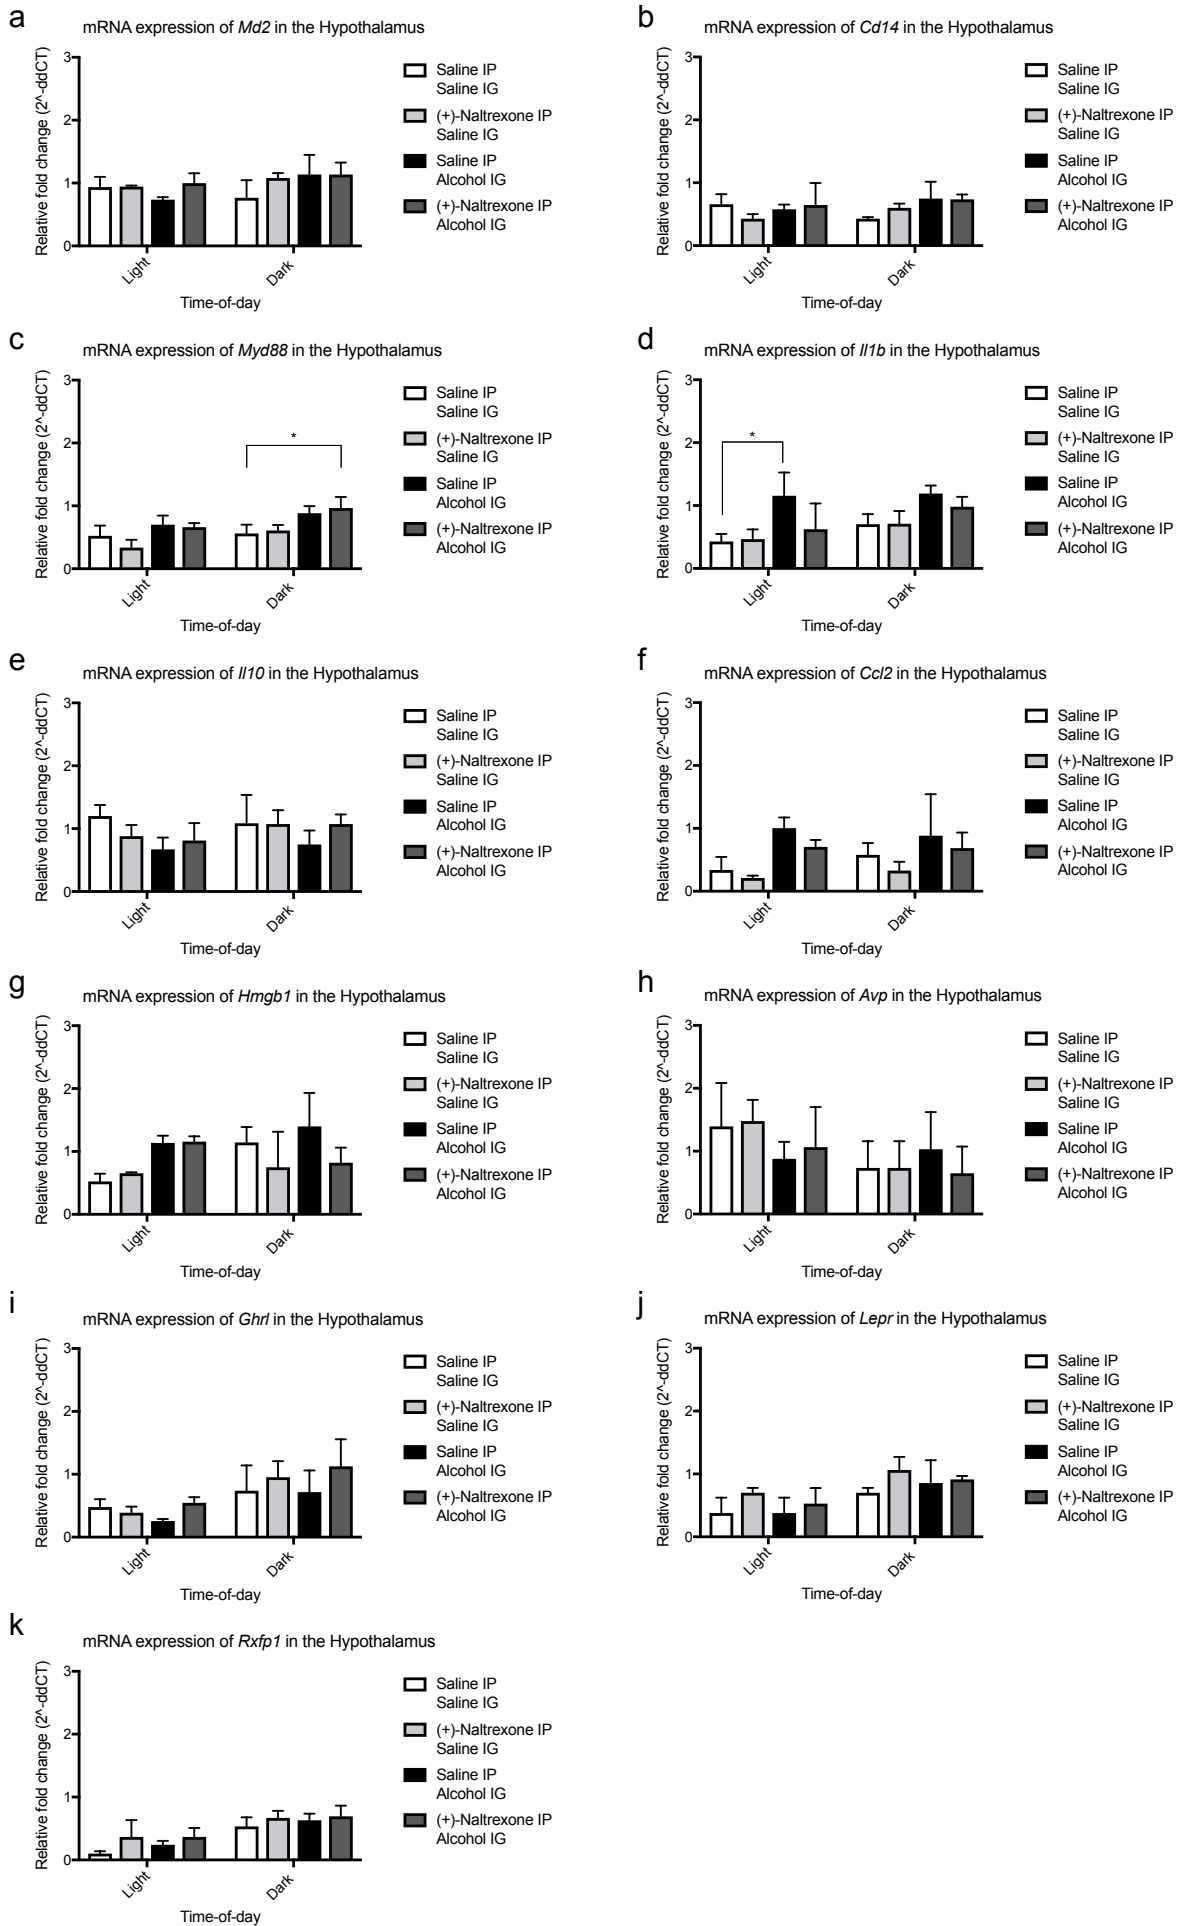

**Figure s7 Effect of alcohol, saline and (+)-Naltrexone (60 mg/kg) on the expression of TLR4 and hunger/thirst-related genes in the hypothalamus.** All data was analysed using a two-way ANOVA with Bonferonni post hoc. Summary values represented as mean±SEM; n=3, \* $p < 0.05$ ; \*\* $p < 0.01$ .



### 3.8.3 Supplementary material statistics

#### Figure s1. Light-cycle dependent water intake.

Paired two-tail t-test

Effect of light cycle,  $t=2.83$   $df=96$ ,  $p = 0.0057$

#### Figure s2 Circadian timing and the dose of (+)-Naltrexone significantly modify water intake. All data analysed using a two-way ANOVA with Tukey post hoc.

Effect of dose of (+)-Naltrexone,  $F_{(6, 48)} = 12.01$ ,  $p < 0.0001$

Effect of light-cycle,  $F_{(1, 8)} = 99.62$ ,  $p < 0.0001$

Interaction: dose x light-cycle,  $F_{(6, 48)} = 5.72$ ,  $p = 0.0002$

#### Figure s3 Circadian timing influences the efficacy of (+)-Naltrexone on decreasing 24 h intake and preference (a –b) of alcohol, 2-4 h intake of alcohol (c) and saccharin (d). All data analysed using a two-way three-way ANOVA with Tukey post hoc (a – c) and two-way ANOVA with Tukey post hoc (d).

(a) 24 h intake

Effect of concentration,  $F_{(7, 288)} = 69.58$ ,  $p < 0.0001$

Effect of light-cycle,  $F_{(1, 288)} = 78.51$ ,  $p < 0.0001$

Effect of pretreatment,  $F_{(1, 288)} = 3.66$ ,  $p = 0.050$

Interaction: concentration x light-cycle,  $F_{(7, 288)} = 14.53$ ,  $p < 0.0001$

Interaction: concentration x pretreatment,  $F_{(7, 288)} = 1.82$ ,  $p = 0.071$

Interaction: light-cycle x pretreatment,  $F_{(1, 288)} = 0.089$ ,  $p = 0.77$

Interaction: concentration x light-cycle x pretreatment,  $F_{(7, 288)} = 1.13$ ,  $p = 0.34$

*(b) 24 h preference*

Effect of concentration,  $F_{(7, 288)} = 1.37, p = 0.22$

Effect of light-cycle,  $F_{(1, 288)} = 356.1, p < 0.0001$

Effect of pretreatment,  $F_{(1, 288)} = 29.93, p < 0.0001$

Interaction: concentration x light-cycle,  $F_{(7, 288)} = 1.25, p = 0.27$

Interaction: concentration x pretreatment,  $F_{(7, 288)} = 0.55, p = 0.79$

Interaction: light-cycle x pretreatment,  $F_{(1, 288)} = 4.60, p = 0.033$

Interaction: concentration x light-cycle x pretreatment,  $F_{(7, 288)} = 1.13, p = 0.35$

*(c) 2 – 4 h limited access to alcohol*

Effect of day of testing,  $F_{(3, 144)} = 11.77, p < 0.0001$

Effect of light-cycle,  $F_{(1, 144)} = 97.97, p < 0.0001$

Effect of pretreatment,  $F_{(1, 144)} = 11.19, p = 0.0011$

Interaction: day of testing x light-cycle,  $F_{(3, 144)} = 2.77, p = 0.044$

Interaction: day of testing x treatment,  $F_{(3, 144)} = 2.29, p = 0.08$

Interaction: light-cycle x pretreatment,  $F_{(1, 144)} = 2.23, p = 0.14$

Interaction: day of testing x light-cycle x pretreatment,  $F_{(3, 144)} = 1.39, p = 0.25$

*(d) 2 h saccharin intake*

Effect of light-cycle,  $F_{(1, 9)} = 68.31, p < 0.0001$

Effect of treatment,  $F_{(1, 9)} = 21.31, p = 0.0013$

Interaction: light-cycle x treatment,  $F_{(1, 9)} = 5.34, p = 0.046$

**Figure s4 Serum ethanol concentration following 2 h (a), 8 h (b) and 24 h (c) alcohol drinking tests and conditioned place preference (d). Summary values represented as mean±SEM; n=6, \* $p < 0.05$ ; \*\* $p < 0.01$ . All data analysed using a two-way ANOVA with Tukey post hoc.**

(a) 2 h

Effect of light-cycle,  $F_{(1, 5)} = 35.06, p = 0.0004$

Effect of pretreatment,,  $F_{(1, 5)} = 0.070, p = 0.80$

Interaction (light-cycle x pretreatment),  $F_{(1, 5)} = 0.33, p = 0.58$

(b) 8 h

Effect of light-cycle,  $F_{(1, 5)} = 95.86, p < 0.0001$

Effect of pretreatment,,  $F_{(1, 5)} = 1.59, p = 0.24$

Interaction (light-cycle x pretreatment),  $F_{(1, 5)} = 0.039, p = 0.85$

(c) 24 h

Effect of light-cycle,  $F_{(1, 5)} = 0.42, p = 0.54$

Effect of pretreatment,,  $F_{(1, 5)} = 3.76, p = 0.088$

Interaction (light-cycle x pretreatment),  $F_{(1, 5)} = 16.27, p = 0.0038$

(d) *Conditioned place preference*

Effect of light-cycle,  $F_{(1, 5)} = 356.1, p < 0.0001$

Effect of pretreatment,,  $F_{(1, 5)} = 29.93, p < 0.0001$

Interaction (light-cycle x pretreatment),  $F_{(1, 5)} = 29.93, p < 0.0001$

**Figure s5 Circadian timing influences efficacy of (+)-Naltrexone on change in conditioned chamber time.** All data analysed using a two-way three-way ANOVA with Tukey post hoc.

*Conditioned place preference*

Effect of pretreatment,  $F_{(1, 56)} = 26.65$ ,  $p < 0.0001$

Effect of conditioning drug,  $F_{(1, 56)} = 2.15$ ,  $p = 0.15$

Effect of light-cycle,  $F_{(1, 56)} = 2.74$ ,  $p = 0.10$

Interaction: conditioning drug x pretreatment,  $F_{(1, 56)} = 14.26$   $p = 0.0004$

Interaction: conditioning drug x light-cycle,  $F_{(1, 56)} = 0.51$ ,  $p = 0.48$

Interaction: pretreatment x light-cycle,  $F_{(1, 56)} = 0.51$ ,  $p = 0.48$

Interaction: conditioning drug x pretreatment x light-cycle,  $F_{(1, 56)} = 0.954$ ,  $p = 0.33$

**Figure s6 Effect of alcohol and (+)-Naltrexone on the expression of TLR4 and reward-related genes in the Nucleus Accumbens.** All data analysed using two-way ANOVA with Bonferonni post hoc.

(a) *Md2* light-cycle ( $F_{(1, 24)} = 3.51$ ,  $p = 0.08$ ), drug ( $F_{(1, 24)} = 11.3$ ,  $p = 0.04$ ), pretreatment ( $F_{(1, 24)} = 0.133$ ,  $p = 0.32$ ). No significant interactions.

(b) *Cd14*, light-cycle ( $F_{(1, 24)} = 0.66$   $p = 0.43$ ), drug ( $F_{(1, 24)} = 5.4$ ,  $p = 0.033$ ), pretreatment ( $F_{(1, 24)} = 0.92$ ,  $p = 0.48$ ). No significant interactions.

(c) *Myd88*, light-cycle ( $F_{(1, 24)} = 0.0072$   $p = 0.93$ ), drug ( $F_{(1, 24)} = 10.11$ ,  $p = 0.0058$ ), pretreatment ( $F_{(1, 24)} = 2.21$ ,  $p = 0.16$ ). No significant interactions.

(d) *Il1b*, light-cycle ( $F_{(1, 24)} = 0.0006$   $p = 0.98$ ), drug ( $F_{(1, 24)} = 0.79$ ,  $p = 0.37$ ), pretreatment ( $F_{(1, 24)} = 0.16$ ,  $p = 0.69$ ). No significant interactions.

(e) *Il10*, light-cycle ( $F_{(1, 24)} = 0.12$   $p = 0.73$ ), pretreatment ( $F_{(1, 24)} = 0.027$ ,  $p = 0.87$ ), drug ( $F_{(1, 24)} = 0.0024$ ,  $p = 0.96$ ). No significant interactions.

(f) *Ccl2*, light-cycle ( $F_{(1, 24)} = 0.433$   $p = 0.51$ ), pretreatment ( $F_{(1, 24)} = 0.12$ ,  $p = 0.91$ ), drug ( $F_{(1, 24)} = 29.7$ ,  $p < 0.0001$ ). There were significant interactions between light-cycle and pretreatment ( $F_{(1, 24)} = 10.17$ ,  $p = 0.0057$ ) light-cycle, pretreatment and drug ( $F_{(1, 24)} = 6.07$ ,  $p = 0.025$ ). No other significant interactions.

(g) *Hmgb1*, light-cycle ( $F_{(1, 24)} = 1.47$   $p = 0.24$ ), pretreatment ( $F_{(1, 24)} = 3.88$ ,  $p = 0.066$ ), drug ( $F_{(1, 24)} = 8.49$ ,  $p = 0.01$ ). No significant interactions.

(h) *Drd1*, light-cycle ( $F_{(1, 24)} = 25.22$   $p = 0.001$ ), pretreatment ( $F_{(1, 24)} = 1.14$ ,  $p = 0.30$ ), drug ( $F_{(1, 24)} = 3.7$ ,  $p = 0.072$ ). No significant interactions.

(i) *Drd2*, light-cycle ( $F_{(1, 24)} = 0.62$   $p = 0.44$ ), pretreatment ( $F_{(1, 24)} = 0.032$ ,  $p = 0.86$ ), drug ( $F_{(1, 24)} = 4.27$ ,  $p = 0.55$ ). There was a significant interactions between drug and pretreatment ( $F_{(1, 24)} = 05.92$   $p = 0.027$ ). No other significant interactions.

(j) *Oprm1*, light-cycle ( $F_{(1, 24)} = 5.63$   $p = 0.031$ ), drug ( $F_{(1, 24)} = 17.78$ ,  $p = 0.0007$ ), pretreatment ( $F_{(1, 24)} = 1.09$ ,  $p = 0.31$ ). No significant interactions.

**Figure s7 Effect of alcohol and (+)-Naltrexone on the expression of TLR4 and hunger/thirst-related genes in the hypothalamus.** All data analysed using two-way ANOVA with Bonferonni post hoc.

(a) *Md2*, light-cycle ( $F_{(1, 24)} = 2.79, p = 0.11$ ), drug ( $F_{(1, 24)} = 0.89, p = 0.36$ ), pretreatment ( $F_{(1, 24)} = 3.82, p = 0.069$ ). No significant interactions.

(b) *Cd14*, light-cycle ( $F_{(1, 24)} = 0.52, p = 0.48$ ), drug ( $F_{(1, 24)} = 4.29, p = 0.055$ ), pretreatment ( $F_{(1, 24)} = 0.0001, p = 0.99$ ). No significant interactions.

(c) *Myd88*, light-cycle ( $F_{(1, 24)} = 13.94, p = 0.0018$ ), drug ( $F_{(1, 24)} = 30.61, p = 0 < 0.001$ ), pretreatment ( $F_{(1, 24)} = 0.21, p = 0.65$ ). No significant interactions.

(d) *Il1b*, light-cycle ( $F_{(1, 24)} = 5.59, p = 0.031$ ), drug ( $F_{(1, 24)} = 17.92, p = 0.006$ ), pretreatment ( $F_{(1, 24)} = 3.22, p = 0.092$ ). No significant interactions.

(e) *Il10*, light-cycle ( $F_{(1, 24)} = 1.06, p = 0.32$ ), drug ( $F_{(1, 24)} = 5.27, p = 0.035$ ), pretreatment ( $F_{(1, 24)} = 0.11, p = 0.74$ ). No significant interactions.

(f) *Ccl2*, light-cycle ( $F_{(1, 24)} = 0.22, p = 0.64$ ), drug ( $F_{(1, 24)} = 3.58, p = 0.077$ ), pretreatment ( $F_{(1, 24)} = 15.65, p = 0.0011$ ). No significant interactions.

(g) *Hmgb1*, light-cycle ( $F_{(1, 24)} = 1.65, p = 0.22$ ), drug ( $F_{(1, 24)} = 8.29, p = 0.011$ ), pretreatment ( $F_{(1, 24)} = 2.68, p = 0.12$ ). There was a significant interactions between light-cycle and pretreatment ( $F_{(1, 24)} = 5.04, p = 0.039$ ). No other significant interactionss.

(h) *Avp*, light-cycle ( $F_{(1, 24)} = 4.23, p = 0.056$ ), drug ( $F_{(1, 24)} = 0.41, p = 0.84$ ), pretreatment ( $F_{(1, 24)} = 3.61, p = 0.076$ ). No significant interactions.

(i) *Grhl*, light-cycle ( $F_{(1, 24)} = 18.36, p = 0.006$ ), drug ( $F_{(1, 24)} = 1.33, p = 0.27$ ), pretreatment ( $F_{(1, 24)} = 2.28, p = 0.15$ ). No significant interactions.

(j) *Lepr*, light-cycle ( $F_{(1, 24)} = 19.38, p = 0.004$ ), drug ( $F_{(1, 24)} = 0.22, p = 0.64$ ), pretreatment ( $F_{(1, 24)} = 6.437, p = 0.022$ ). No significant interactions.

(k) *Rxfp1*, light-cycle ( $F_{(1, 24)} = 36.89, p < 0.0001$ ), drug ( $F_{(1, 24)} = 11.20, p = 0.29$ ), pretreatment ( $F_{(1, 24)} = 6.01, p = 0.026$ ). No significant interactions.
